# Supplementary material
Source: PubMed Central journal article supplement (PMC3157087)

# PB2 Gene Segment

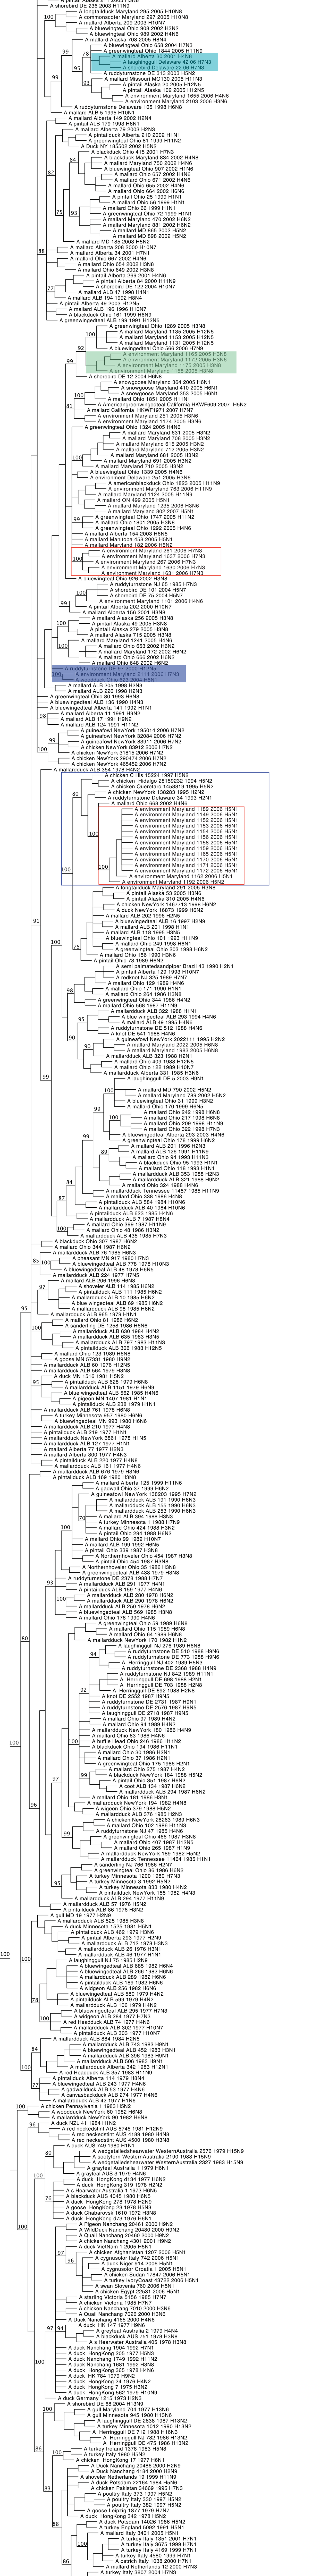

# PB1 Gene Segment

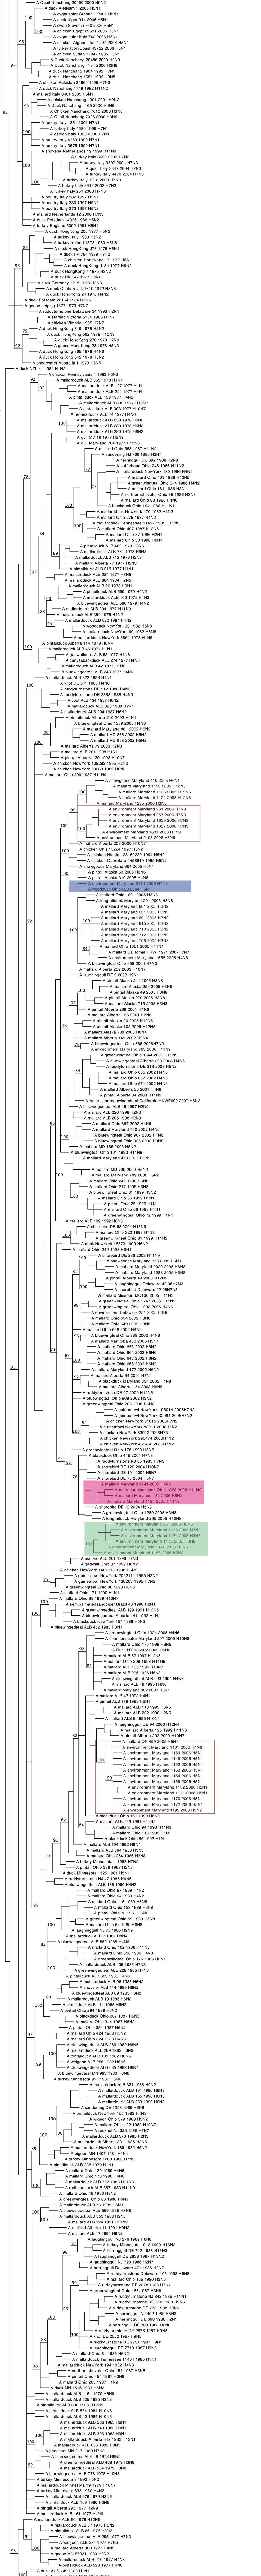

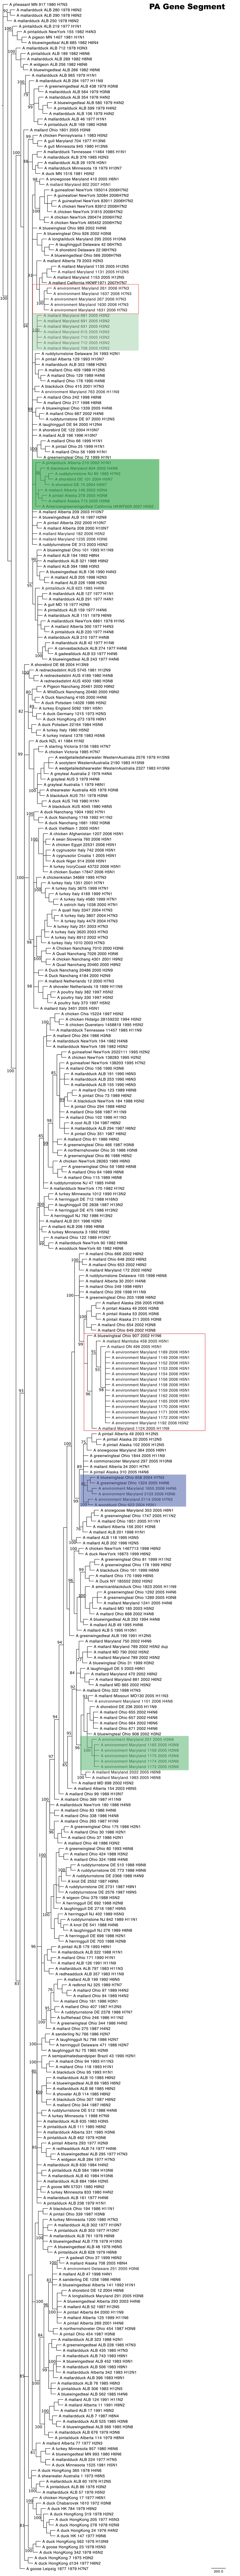

A pheasant MN 917 1980 H7N3  
A mallardduck ALB 280 1978 H6N2  
A mallardduck ALB 290 1978 H6N2  
A mallardduck ALB 250 1978 H6N2  
A pintailduck ALB 219 1977 H1N1  
A pintailduck NewYork 155 1982 H4N3  
A pigeon MN 1407 1981 H1N1  
A bluewingedteal ALB 685 1982 H6N4  
A mallardduck ALB 712 1978 H3N3  
A pintailduck ALB 189 1982 H6N6  
A mallardduck ALB 289 1982 H6N6  
A widgeon ALB 256 1982 H6N6  
A bluewingedteal ALB 266 1982 H6N6  
A mallardduck ALB 965 1979 H1N1  
A mallardduck ALB 294 1977 H1N9  
A greenwingedteal ALB 438 1979 H3N8  
A mallardduck ALB 564 1979 H3N8  
A mallardduck ALB 354 1978 H4N2  
A bluewingedteal ALB 580 1979 H4N2  
A pintailduck ALB 599 1979 H4N2  
A mallardduck ALB 106 1979 H4N2  
A mallardduck ALB 46 1977 H1N1  
A pintailduck ALB 169 1980 H3N8  
A mallard Ohio 1801 2005 H3N8  
A chicken Pennsylvania 1 1983 H5N2  
A gull Maryland 704 1977 H13N6  
A gull Minnesota 945 1980 H13N6  
A mallardduck Tennessee 11464 1985 H1N1  
A mallardduck ALB 376 1985 H2N3  
A mallardduck ALB 26 1976 H3N1  
A mallardduck Minnesota 19 1979 H10N7  
A duck MN 1516 1981 H5N2  
A snowgoose Maryland 410 2005 H6N1  
A mallard Maryland 802 2007 H5N1  
A guineafowl NewYork 195014 2006H7N2  
A guineafowl NewYork 32084 2006H7N2  
A guineafowl NewYork 83911 2006H7N2  
A chicken NewYork 31815 2006H7N2  
A chicken NewYork 290474 2006H7N2  
A chicken NewYork 465452 2006H7N2  
A bluewingteal Ohio 989 2002 H4N6  
A bluewingteal Ohio 926 2002 H3N8  
A longtailduck Maryland 295 2005 H10N8  
A laughinggull Delaware 42 06H7N3  
A shorebird Delaware 22 06H7N3  
A bluewingedteal Ohio 566 2006H7N9  
A mallard Alberta 79 2003 H2N3  
A mallard Maryland 1135 2005 H12N5  
A mallard Maryland 1131 2005 H12N5  
A mallard Maryland 1153 2005 H12N5  
A mallard California HKW1971 2007H7N7  
A environment Maryland 261 2006 H7N3  
A environment Maryland 1637 2006 H7N3  
A environment Maryland 267 2006 H7N3  
A environment Maryland 1630 2006 H7N3  
A environment Maryland 1631 2006 H7N3  
A mallard Maryland 681 2005 H3N2  
A mallard Maryland 691 2005 H3N2  
A mallard Maryland 631 2005 H3N2  
A mallard Maryland 615 2005 H3N2  
A mallard Maryland 710 2005 H3N2  
A mallard Maryland 712 2005 H3N2  
A mallard Maryland 708 2005 H3N2  
A ruddyturnstone Delaware 34 1993 H2N1  
A pintail Alberta 129 1993 H10N7  
A mallardduck ALB 353 1988 H2N3  
A mallard Ohio 409 1988 H12N5  
A mallard Ohio 129 1989 H4N6  
A mallard Ohio 178 1990 H4N6  
A blackduck Ohio 415 2001 H7N3  
A environment Maryland 763 2006 H11N9  
A mallard Ohio 242 1998 H6N8  
A mallard Ohio 217 1998 H6N8  
A bluewingteal Ohio 1339 2005 H4N6  
A ruddyturnstone DE 97 2000 H12N5  
A laughinggull DE 94 2000 H12N4  
A shorebird DE 122 2004 H10N7  
A mallard ALB 196 1996 H10N7  
A mallard Ohio 66 1999 H1N1  
A pintail Ohio 25 1999 H1N1  
A mallard Ohio 56 1999 H1N1  
A greenwingteal Ohio 72 1999 H1N1  
A pintailduck Alberta 210 2002 H1N1  
A blackduck Maryland 834 2002 H4N8  
A ruddyturnstone NJ 65 1985 H7N3  
A shorebird DE 101 2004 H5N7  
A shorebird DE 75 2004 H5N7  
A mallard Alberta 149 2002 H2N4  
A pintail Alaska 279 2005 H3N8  
A mallard Alaska 715 2005 H3N8  
A Americangreenwingedteal California HKWF609 2007 H5N2  
A mallard Alberta 209 2003 H10N7  
A bluewingedteal ALB 16 1997 H2N9  
A pintail Alberta 202 2000 H10N7  
A mallard Alberta 208 2000 H10N7  
A mallard Maryland 182 2006 H5N2  
A mallard Maryland 1235 2006 H3N6  
A ruddyturnstone DE 313 2003 H5N2  
A bluewingteal Ohio 101 1993 H11N9  
A mallard ALB 194 1992 H8N4  
A mallardduck ALB 321 1988 H9N2  
A mallard ALB 394 1988 H3N3  
A bluewingedteal ALB 136 1990 H4N3  
A mallard ALB 205 1998 H2N3  
A mallard ALB 226 1998 H2N3  
A pintailduck ALB 623 1985 H4N6  
A mallardduck ALB 127 1977 H1N1  
A mallardduck ALB 291 1977 H4N1  
A gull MD 19 1977 H2N9  
A pintailduck ALB 159 1977 H4N6  
A mallardduck NewYork 1151 1979 H6N9  
A mallardduck NewYork 6861 1978 H1N5  
A mallard Alberta 300 1977 H4N3  
A pintailduck ALB 220 1977 H4N8  
A mallardduck ALB 210 1977 H4N8  
A mallardduck ALB 42 1977 H1N6  
A canvasbackduck ALB 274 1977 H4N6  
A gadwallduck ALB 53 1977 H4N6  
A bluewingedteal ALB 243 1977 H4N6  
A shorebird DE 68 2004 H13N9  
A redneckedstint AUS 5745 1981 H12N9  
A redneckedstint AUS 4189 1980 H4N8  
A redneckedstint AUS 4500 1980 H3N8  
A Pigeon Nanchang 20461 2000 H9N2  
A WildDuck Nanchang 20480 2000 H9N2  
A Duck Nanchang 4165 2000 H4N6  
A duck Potsdam 14026 1986 H5N2  
A turkey England 5092 1991 H5N1  
A duck Germany 1215 1973 H2N3  
A duck HongKong d73 1976 H6N1  
A duck Potsdam 22164 1984 H5N6  
A turkey Italy 1980 H5N2  
A turkey Ireland 1378 1983 H5N8  
A duck NZL 41 1984 H1N2  
A starling Victoria 5156 1985 H7N7  
A chicken Victoria 1985 H7N7  
A wedgetailedshearwater WesternAustralia 2576 1979 H15N9  
A sootytern WesternAustralia 2190 1983 H15N9  
A wedgetailedshearwater WesternAustralia 2327 1983 H15N9  
A grayteal Australia 2 1979 H4N4  
A grayteal AUS 3 1979 H4N6  
A grayteal Australia 1 1979 H6N1  
A shearwater Australia 405 1978 H3N8  
A blackduck AUS 751 1978 H3N8  
A duck AUS 749 1980 H1N1  
A blackduck AUS 4045 1980 H6N5  
A duck Nanchang 1904 1992 H7N1  
A duck Nanchang 1749 1992 H11N2  
A duck Nanchang 1681 1992 H3N8  
A duck VietNam 1 2005 H5N1  
A chicken Afghanistan 1207 2006 H5N1  
A swan Slovenia 780 2006 H5N1  
A chicken Egypt 22531 2006 H5N1  
A cygnusolor Italy 742 2006 H5N1  
A cygnusolor Croatia 1 2005 H5N1  
A duck Niger 914 2006 H5N1  
A turkey IvoryCoast 43722 2006 H5N1  
A chicken Sudan 17847 2006 H5N1  
A chickenkistan 34669 1995 H7N3  
A turkey Italy 1351 2001 H7N1  
A turkey Italy 3675 1999 H7N1  
A turkey Italy 4169 1999 H7N1  
A turkey Italy 4580 1999 H7N1  
A ostrich Italy 1038 2000 H7N1  
A quail Italy 3347 2004 H7N3  
A turkey Italy 3807 2004 H7N3  
A turkey Italy 4479 2004 H7N3  
A turkey Italy 251 2003 H7N3  
A turkey Italy 3620 2003 H7N3  
A turkey Italy 8912 2002 H7N3  
A turkey Italy 1010 2003 H7N3  
A Chicken Nanchang 7010 2000 H3N6  
A Quail Nanchang 7026 2000 H3N6  
A chicken Nanchang 4301 2001 H9N2  
A Quail Nanchang 20460 2000 H9N2  
A Duck Nanchang 20486 2000 H2N9  
A Duck Nanchang 4184 2000 H2N9  
A mallard Netherlands 12 2000 H7N3  
A shoveler Netherlands 19 1999 H11N9  
A poultry Italy 382 1997 H5N2  
A poultry Italy 330 1997 H5N2  
A poultry Italy 373 1997 H5N2  
A mallard Italy 3401 2005 H5N1  
A chicken Chis 15224 1997 H5N2  
A chicken Hidalgo 28159232 1994 H5N2  
A chicken Queretaro 1458819 1995 H5N2  
A mallardduck Tennessee 11457 1985 H11N9  
A mallard Ohio 264 1986 H3N8  
A mallardduck NewYork 194 1982 H4N8  
A mallardduck NewYork 189 1982 H5N2  
A guineafowl NewYork 2022111 1995 H2N2  
A chicken NewYork 138203 1995 H2N2  
A guineafowl NewYork 138203 1995 H2N2  
A mallard Ohio 156 1990 H3N6  
A mallardduck ALB 191 1990 H6N3  
A mallardduck ALB 253 1990 H6N3  
A mallardduck ALB 155 1990 H6N3  
A mallard Ohio 123 1989 H6N8  
A pintail Ohio 73 1989 H6N2  
A blackduck NewYork 184 1988 H5N2  
A pintail Ohio 294 1988 H6N2  
A mallard Ohio 568 1987 H11N9  
A mallard Ohio 102 1986 H11N3  
A coot ALB 134 1987 H6N2  
A mallardduck ALB 294 1987 H6N2  
A pintail Ohio 351 1987 H6N2  
A mallard Ohio 81 1986 H6N2  
A greenwingteal Ohio 466 1987 H3N8  
A northernshoveler Ohio 35 1986 H3N2  
A greenwingteal Ohio 86 1986 H6N8  
A chicken NewYork 28263 1989 H6N3  
A greenwingteal Ohio 59 1989 H6N8  
A mallard Ohio 64 1989 H6N8  
A mallard Ohio 115 1989 H6N8  
A ruddyturnstone NJ 47 1985 H4N6  
A mallard NewYork 170 1982 H1N2  
A turkey Minnesota 1012 1990 H13N2  
A herringgull DE 712 1988 H16N3  
A laughinggull DE 2838 1987 H13N2  
A herringgull DE 475 1986 H13N2  
A herringgull NJ 782 1986 H13N2  
A mallard ALB 201 1996 H2N3  
A turkey Minnesota 3 1992 H5N2  
A mallard Ohio 122 1989 H10N7  
A mallardduck NewYork 90 1982 H6N8  
A woodduck NewYork 60 1982 H6N8  
A mallard Ohio 666 2002 H6N2  
A mallard Ohio 648 2002 H6N2  
A mallard Ohio 653 2002 H6N2  
A mallard Maryland 172 2002 H6N2  
A ruddyturnstone Delaware 105 1998 H6N8  
A mallard Alberta 30 2001 H4N8  
A mallard Ohio 249 1998 H6N1  
A mallard Ohio 209 1998 H11N9  
A greenwingteal Ohio 203 1998 H6N2  
A mallard Alaska 256 2005 H3N8  
A pintail Alaska 49 2005 H3N8  
A pintail Alaska 53 2005 H3N6  
A pintail Alaska 211 2005 H3N8  
A mallard Ohio 654 2002 H3N8  
A mallard Ohio 649 2002 H3N8  
A bluewingteal Ohio 907 2002 H1N6  
A mallard Manitoba 458 2005 H5N1  
A mallard ON 499 2005 H5N1  
A environment Maryland 1189 2006 H5N1  
A environment Maryland 1149 2006 H5N1  
A environment Maryland 1152 2006 H5N1  
A environment Maryland 1153 2006 H5N1  
A environment Maryland 1154 2006 H5N1  
A environment Maryland 1156 2006 H5N1  
A environment Maryland 1158 2006 H5N1  
A environment Maryland 1159 2006 H5N1  
A environment Maryland 1162 2006 H5N1  
A environment Maryland 1165 2006 H5N1  
A environment Maryland 1170 2006 H5N1  
A environment Maryland 1171 2006 H5N1  
A environment Maryland 1172 2006 H5N1  
A environment Maryland 1192 2006 H5N2  
A mallard Maryland 1124 2005 H11N9  
A pintail Alberta 49 2005 H12N5  
A pintail Alaska 20 2005 H12N5  
A pintail Alaska 102 2005 H12N5  
A snowgoose Maryland 364 2005 H11N9  
A commonscoter Maryland 297 2005 H10N8  
A mallard Alberta 34 2001 H7N1  
A pintail Alaska 310 2005 H4N6  
A bluewingteal Ohio 6058 2004 H7N3  
A greenwingteal Ohio 1324 2005 H4N6  
A environment Maryland 1655 2006 H4N6  
A environment Maryland 2103 2006 H3N6  
A environment Maryland 2114 2006 H7N3  
A woodduck Ohio 623 2004 H5N1  
A snowgoose Maryland 353 2005 H6N1  
A greenwingteal Ohio 1747 2005 H11N2  
A mallard Ohio 1851 2005 H11N1  
A mallard Alberta 156 2001 H3N8  
A mallard ALB 201 1998 H1N1  
A mallard ALB 118 1995 H3N5  
A mallard ALB 202 1996 H2N5  
A chicken NewYork 1467713 1998 H6N2  
A duck NewYork 16873 1999 H6N2  
A greenwingteal Ohio 81 1999 H11N2  
A greenwingteal Ohio 178 1999 H6N2  
A blackduck Ohio 161 1999 H6N9  
A mallard Ohio 170 1999 H6N5  
A Duck NY 185502 2002 H5N2  
A americanblackduck Ohio 1823 2005 H11N9  
A greenwingteal Ohio 1289 2005 H4N6  
A mallard Maryland 1241 2005 H4N6  
A mallard MD 185 2003 H2N1  
A bluewingedteal ALB 293 1994 H4N6  
A mallard ALB 49 1995 H4N6  
A mallard ALB 5 1995 H10N1  
A greenwingedteal ALB 199 1991 H12N5  
A mallard Maryland 750 2002 H4N6  
A mallard Maryland 789 2002 H5N2 dup  
A mallard MD 790 2002 H5N2  
A mallard Maryland 789 2002 H5N2  
A bluewingteal Ohio 31 1999 H3N2  
A laughinggull DE 5 2003 H9N2  
A mallard Maryland 470 2002 H6N2  
A mallard Maryland 881 2002 H6N2  
A mallard MD 865 2002 H5N2  
A mallard Ohio 322 1998 H7N3  
A mallard Missouri MO130 2005 H11N3  
A environment Maryland 1101 2006 H4N6  
A shorebird DE 236 2003 H1 2008  
A mallard Ohio 655 2002 H4N6  
A mallard Ohio 664 2002 H6N6  
A mallard Ohio 671 2002 H4N6  
A bluewingteal Ohio 908 2002 H3N2  
A environment Maryland 251 2005 H3N6  
A environment Maryland 1165 2005 H3N8  
A environment Maryland 1158 2005 H3N8  
A environment Maryland 1175 2005 H3N8  
A environment Maryland 1174 2005 H3N6  
A environment Maryland 1172 2005 H3N6  
A mallard Maryland 2022 2005 H6N8  
A mallard Maryland 1983 2005 H6N8  
A mallard MD 898 2002 H5N2  
A mallard Alberta 154 2003 H6N5  
A mallard Ohio 99 1989 H10N7  
A mallard Ohio 399 1987 H11N9  
A mallardduck NewYork 180 1986 H4N9  
A mallard Ohio 83 1986 H4N6  
A mallard Ohio 338 1986 H4N8  
A mallard Ohio 265 1987 H1N9  
A greenwingteal Ohio 175 1986 H2N1  
A mallard Ohio 30 1986 H2N1  
A mallard Ohio 37 1986 H2N1  
A mallard Ohio 48 1986 H3N2  
A greenwingteal Ohio 80 1993 H6N8  
A mallard Ohio 424 1988 H3N2  
A mallard Ohio 324 1988 H4N6  
A ruddyturnstone DE 510 1988 H9N6  
A ruddyturnstone DE 773 1988 H9N6  
A ruddyturnstone DE 2368 1988 H4N9  
A knot DE 2552 1987 H9N5  
A ruddyturnstone DE 2731 1987 H9N1  
A ruddyturnstone DE 2576 1987 H9N5  
A widgeon Ohio 379 1988 H5N2  
A herringgull DE 692 1988 H2N8  
A laughinggull DE 2718 1987 H9N5  
A herringgull NJ 402 1989 H5N3  
A ruddyturnstone NJ 842 1989 H11N1  
A knot DE 541 1988 H4N6  
A laughinggull NJ 276 1989 H6N8  
A herringgull DE 698 1988 H2N1  
A herringgull DE 703 1988 H2N8  
A pintail ALB 179 1993 H6N1  
A mallardduck ALB 322 1988 H1N1  
A mallard Ohio 171 1990 H1N1  
A mallard ALB 126 1991 H11N9  
A mallardduck ALB 797 1983 H11N3  
A redheadduck ALB 357 1983 H11N9  
A mallard ALB 199 1992 H6N5  
A redknot NJ 325 1989 H7N7  
A mallard Ohio 97 1989 H4N2  
A mallard Ohio 94 1989 H4N2  
A mallard Ohio 181 1986 H3N1  
A mallard Ohio 407 1987 H12N5  
A ruddyturnstone DE 2378 1988 H7N7  
A bufflehead Ohio 246 1986 H11N2  
A greenwingteal Ohio 344 1986 H4N2  
A mallard Ohio 275 1987 H4N2  
A sanderling NJ 766 1986 H2N7  
A laughinggull NJ 798 1986 H2N7  
A herringgull Delaware 471 1986 H2N7  
A laughinggull NJ 75 1985 H2N9  
A semipalmatedsandpiper Brazil 43 1990 H2N1  
A mallard Ohio 94 1993 H11N3  
A mallard Ohio 118 1993 H1N1  
A mallardduck ALB 10 1985 H6N2  
A bluewingedteal ALB 69 1985 H6N2  
A mallardduck ALB 98 1985 H6N2  
A shoveler ALB 114 1985 H6N2  
A blackduck Ohio 307 1987 H6N2  
A mallard Ohio 344 1987 H6N2  
A ruddyturnstone DE 512 1988 H4N6  
A turkey Minnesota 1 1988 H7N9  
A mallardduck ALB 635 1983 H3N5  
A pintailduck ALB 111 1985 H6N2  
A mallardduck ALB 331 1985 H3N6  
A pintailduck ALB 462 1979 H3N6  
A pintail ALB 293 1977 H2N9  
A redheadduck ALB 74 1977 H4N6  
A bluewingedteal ALB 295 1977 H7N3  
A widgeon ALB 284 1977 H7N3  
A mallardduck ALB 630 1984 H4N2  
A pintailduck ALB 584 1984 H10N6  
A mallardduck ALB 40 1984 H10N6  
A mallardduck ALB 884 1984 H2N5  
A goose MN 57331 1980 H9N2  
A turkey Minnesota 833 1980 H4N2  
A mallardduck ALB 161 1977 H4N6  
A pintailduck ALB 238 1979 H1N1  
A blackduck Ohio 194 1986 H11N1  
A pintail Ohio 339 1987 H3N8  
A turkey Minnesota 1200 1980 H7N3  
A mallardduck ALB 302 1977 H10N7  
A pintailduck ALB 303 1977 H10N7  
A mallardduck ALB 761 1978 H6N8  
A bluewingedteal ALB 778 1978 H10N3  
A bluewingedteal ALB 48 1978 H6N5  
A pintailduck ALB 628 1979 H6N8  
A gadwall Ohio 37 1999 H6N2  
A mallard Alaska 708 2005 H8N4  
A environment Delaware 251 2005 H3N6  
A mallard ALB 47 1998 H4N1  
A sanderling DE 1258 1986 H6N6  
A shorebird DE 12 2004 H6N8  
A longtailduck Maryland 291 2005 H3N8  
A bluewingedteal Alberta 293 2003 H4N6  
A mallard ALB 52 1997 H12N5  
A pintail Alberta 84 2000 H11N9  
A mallard Alberta 125 1999 H11N6  
A pintail Alberta 269 2001 H4N6  
A northernshoveler Ohio 454 1987 H3N8  
A pintail Ohio 454 1987 H3N8  
A mallardduck ALB 323 1988 H2N1  
A greenwingedteal ALB 228 1985 H7N3  
A mallardduck ALB 435 1985 H7N3  
A mallardduck ALB 743 1983 H9N1  
A bluewingedteal ALB 452 1983 H3N1  
A mallardduck ALB 506 1983 H9N1  
A mallardduck Alberta 342 1983 H12N1  
A mallardduck ALB 396 1983 H9N1  
A mallardduck ALB 76 1985 H6N3  
A pintailduck ALB 306 1983 H12N5  
A bluewingedteal ALB 562 1985 H4N6  
A mallard ALB 124 1991 H11N2  
A mallard Alberta 11 1991 H9N2  
A mallard ALB 17 1991 H9N2  
A mallardduck ALB 7 1987 H8N4  
A mallardduck ALB 525 1985 H3N8  
A bluewingedteal ALB 569 1985 H3N8  
A mallardduck ALB 676 1979 H3N6  
A pintailduck Alberta 114 1979 H8N4  
A mallard Alberta 77 1977 H2N3  
A turkey Minnesota 957 1980 H6N6  
A bluewingedteal MN 993 1980 H6N6  
A mallardduck ALB 224 1977 H7N5  
A duck Minnesota 1525 1981 H5N1  
A duck HongKong 365 1978 H4N6  
A shearwater Australia 1 1973 H6N5  
A mallardduck ALB 60 1976 H12N5  
A pintailduck ALB 86 1976 H3N2  
A mallardduck ALB 57 1976 H5N2  
A chicken HongKong 17 1977 H6N1  
A duck Chabarovsk 1610 1972 H3N8  
A duck HK 784 1979 H9N2  
A duck HongKong 319 1978 H2N2  
A duck HongKong 205 1977 H5N3  
A duck HongKong 278 1978 H2N9  
A duck HongKong 24 1976 H4N2  
A duck HK 147 1977 H6N6  
A duck HongKong 562 1979 H10N9  
A goose HongKong 23 1978 H5N3  
A duck HongKong 342 1978 H5N2  
A duck HongKong 7 1975 H3N2  
A duck HongKong d134 1977 H6N2  
A goose Leipzig 1877 1979 H7N7

# NP Gene Segment

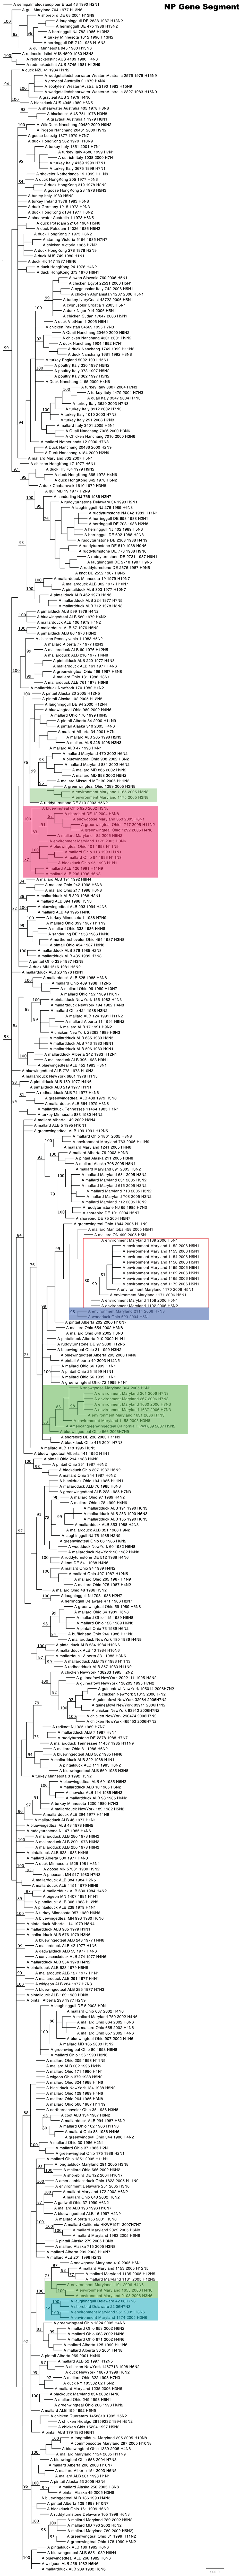

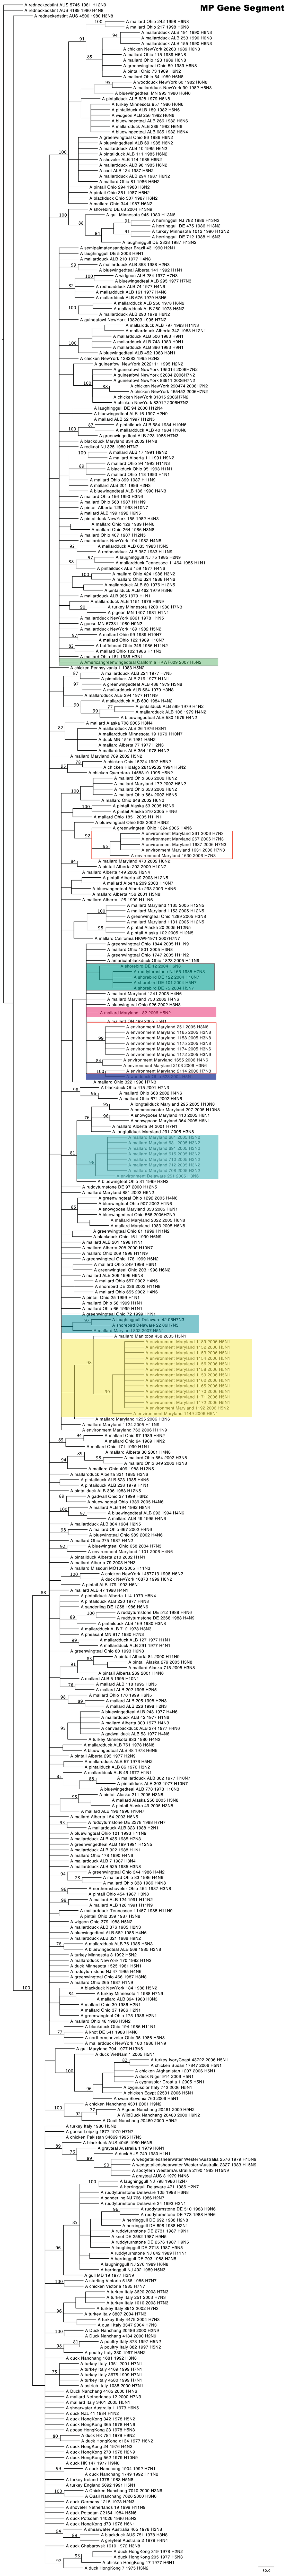

# MP Gene Segment

# NS Gene Segment

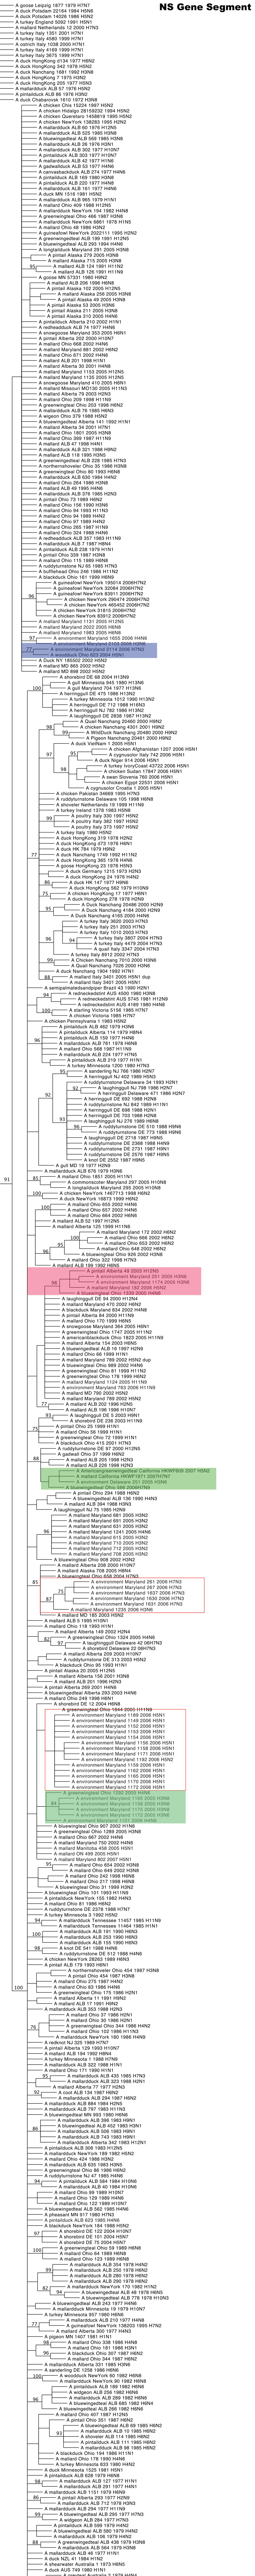

Supplement: NIHMS297075-supplement-01.pdf [file NIHMS297075-supplement-01.pdf]
